# Supplementary material
Source: PubMed Central journal article supplement (PMC3245798)
Supplement: NIHMS332397-supplement-1.pdf [file NIHMS332397-supplement-1.pdf]

|     |        |           | Median intensities (cell types and groups) |              |        |        |        |        |        |        |                |            |                 |        |
|-----|--------|-----------|--------------------------------------------|--------------|--------|--------|--------|--------|--------|--------|----------------|------------|-----------------|--------|
|     | SeqID  | SeqName   | Earray_Refseq                              | H23          | H522   | ScABER | T24    | H358   | H441   | HT1376 | non-permissive | permissive | median distance |        |
| 1   | 652903 | TMEM45B   | *2,3                                       | NM_138788    | 1.095  | 1.128  | 5.065  | 3.045  | 11.872 | 15.370 | 9.485          | 1.622      | 11.872          | 10.250 |
| 2   | 655324 | CLDN7     | *1                                         | NM_001307    | 4.153  | 5.007  | 12.941 | 5.357  | 13.441 | 14.044 | 14.444         | 5.027      | 14.044          | 9.017  |
| 3   | 672299 | TMEM125   | *2,3                                       | NM_144626    | 6.073  | 3.920  | 9.911  | 5.225  | 14.186 | 14.759 | 14.032         | 5.295      | 14.186          | 8.891  |
| 4   | 660062 | GPR110    | *2,3                                       | NM_153840    | 1.037  | 1.175  | 11.683 | 10.577 | 14.591 | 15.663 | 11.851         | 5.789      | 14.591          | 8.802  |
| 5   | 642093 | CLDN4     | *1                                         | NM_001305    | 2.901  | 3.131  | 9.426  | 4.223  | 12.603 | 12.064 | 12.629         | 3.827      | 12.497          | 8.670  |
| 6   | 654402 | ST14      | *2                                         | NM_021978    | 4.874  | 5.673  | 11.969 | 5.639  | 13.405 | 13.913 | 13.096         | 5.656      | 13.473          | 7.818  |
| 7   | 656701 | EPHA1     | *2                                         | NM_005232    | 1.624  | 1.386  | 8.080  | 1.490  | 9.596  | 9.489  | 8.769          | 1.703      | 9.428           | 7.725  |
| 8   | 676384 | MCTP2     | *2,3                                       | NM_018349    | 1.362  | 1.045  | 7.288  | 1.130  | 8.753  | 9.536  | 8.827          | 1.179      | 8.833           | 7.655  |
| 9   | 643771 | PVRL4     | *2                                         | NM_030916    | 1.705  | 0.998  | 6.312  | 1.129  | 8.875  | 8.781  | 11.287         | 1.666      | 8.875           | 7.209  |
| 10  | 648785 | CSF2RA    | *2                                         | NM_172247    | 5.185  | 2.971  | 2.884  | 1.155  | 7.504  | 10.486 | 10.066         | 2.907      | 10.066          | 7.159  |
| 11  | 660004 | ENPP5     |                                            | NM_021572    | 3.523  | 0.917  | 6.791  | 0.890  | 8.832  | 10.028 | 7.068          | 1.794      | 8.832           | 7.038  |
| 12  | 673718 | TREM1     | *2                                         | NM_018643    | 2.075  | 0.971  | 1.027  | 1.056  | 7.939  | 11.902 | 5.470          | 1.024      | 7.939           | 6.916  |
| 13  | 681511 | GPA33     | *2                                         | NM_005814    | 1.717  | 3.327  | 1.365  | 1.022  | 8.573  | 9.502  | 6.949          | 1.683      | 8.573           | 6.890  |
| 14  | 658566 | TNFRSF10C |                                            | NM_003841    | 3.853  | 1.058  | 1.038  | 3.879  | 9.750  | 8.076  | 6.520          | 1.394      | 8.076           | 6.682  |
| 15  | 656363 | SCNN1A    | *2,3                                       | NM_001038    | 4.607  | 0.990  | 4.451  | 6.514  | 11.126 | 12.077 | 10.680         | 4.529      | 11.126          | 6.597  |
| 16  | 652933 | PTAFR     |                                            | NM_000952    | 4.060  | 4.446  | 8.679  | 4.075  | 11.329 | 10.801 | 10.283         | 4.337      | 10.790          | 6.453  |
| 17  | 664396 | ANKRD22   |                                            | NM_144590    | 7.644  | 0.898  | 8.654  | 0.932  | 11.214 | 9.656  | 11.249         | 4.854      | 11.214          | 6.359  |
| 18  | 662347 | SLC04C1   |                                            | NM_180991    | 5.367  | 1.053  | 0.907  | 1.183  | 6.248  | 7.485  | 7.534          | 1.059      | 7.158           | 6.100  |
| 19  | 671227 | MUC15     |                                            | NM_145650    | 0.920  | 4.474  | 0.933  | 0.983  | 7.051  | 6.507  | 9.769          | 0.964      | 7.051           | 6.086  |
| 20  | 671510 | TNFSF15   |                                            | NM_005118    | 1.554  | 1.033  | 3.603  | 1.074  | 7.356  | 5.272  | 6.587          | 1.105      | 6.587           | 5.482  |
| 21  | 668056 | KRTCAP3   | *2,3                                       | NM_173853    | 6.384  | 5.598  | 10.608 | 4.881  | 12.060 | 10.774 | 11.293         | 5.880      | 11.331          | 5.451  |
| 22  | 651936 | MUC1      |                                            | NM_002456    | 9.906  | 8.317  | 10.528 | 7.313  | 11.729 | 14.816 | 14.202         | 9.122      | 14.202          | 5.080  |
| 23  | 666420 | EGF       |                                            | NM_001963    | 1.191  | 1.199  | 3.756  | 2.247  | 8.275  | 6.830  | 4.886          | 1.825      | 6.830           | 5.006  |
| 24  | 678827 | TMC4      | *2,3                                       | NM_144686    | 5.842  | 5.809  | 8.383  | 5.908  | 10.739 | 10.988 | 8.476          | 6.112      | 10.667          | 4.555  |
| 25  | 675238 | FCGR2A    | *2                                         | NM_021642    | 3.993  | 4.174  | 3.343  | 2.866  | 9.051  | 8.305  | 4.866          | 3.777      | 8.305           | 4.528  |
| 26  | 668630 | MUC16     |                                            | NM_024690    | 5.622  | 2.335  | 5.644  | 2.573  | 8.916  | 6.917  | 10.286         | 4.427      | 8.916           | 4.489  |
| 27  | 644414 | ERBB3     | *1                                         | NM_001982    | 7.304  | 5.074  | 9.156  | 4.170  | 10.475 | 11.567 | 10.743         | 6.483      | 10.839          | 4.355  |
| 28  | 672447 | C19orf46  | *2                                         | NM_001039876 | 8.344  | 8.348  | 6.889  | 6.077  | 12.767 | 11.777 | 11.766         | 7.547      | 11.815          | 4.268  |
| 29  | 677376 | C1orf210  | *2,3                                       | NM_182517    | 2.976  | 3.230  | 5.837  | 1.116  | 6.831  | 7.545  | 9.152          | 3.286      | 7.545           | 4.259  |
| 30  | 678029 | GPR37     |                                            | NM_005302    | 9.101  | 3.104  | 6.321  | 3.754  | 9.241  | 10.674 | 9.563          | 5.316      | 9.563           | 4.247  |
| 31  | 662729 | ZPLD1     | *2                                         | NM_175056    | 0.894  | 0.895  | 0.866  | 0.884  | 4.821  | 6.345  | 5.085          | 0.882      | 5.085           | 4.204  |
| 32  | 679847 | MAL2      | *2                                         | NM_052886    | 10.573 | 2.899  | 13.398 | 11.964 | 15.452 | 15.516 | 14.554         | 11.252     | 15.428          | 4.175  |
| 33  | 664418 | C6orf25   | *2                                         | NM_138272    | 2.214  | 2.313  | 1.936  | 0.989  | 6.155  | 5.350  | 7.779          | 2.075      | 6.155           | 4.080  |
| 34  | 652336 | ADAM28    |                                            | NM_021777    | 1.355  | 0.993  | 2.463  | 1.147  | 5.179  | 6.287  | 2.597          | 1.182      | 5.179           | 3.997  |
| 35  | 652634 | SPINT1    |                                            | NM_181642    | 7.067  | 5.027  | 11.114 | 9.481  | 12.302 | 12.091 | 11.129         | 8.143      | 12.091          | 3.948  |
| 36  | 681183 | PKD1L2    |                                            | NM_001076780 | 0.983  | 2.140  | 2.438  | 1.081  | 5.256  | 3.326  | 5.370          | 1.223      | 5.141           | 3.919  |
| 37  | 641358 | TMC5      | *2,3                                       | NM_024780    | 7.083  | 7.306  | 7.410  | 1.146  | 10.512 | 13.613 | 10.920         | 7.072      | 10.920          | 3.848  |
| 38  | 657781 | MPZL3     | *2,3                                       | NM_198275.1  | 6.836  | 7.802  | 8.771  | 9.361  | 12.142 | 11.624 | 11.933         | 8.337      | 11.933          | 3.597  |
| 39  | 641507 | AREG      |                                            | NM_001657    | 11.929 | 13.596 | 15.424 | 11.130 | 16.567 | 16.106 | 15.718         | 12.474     | 16.060          | 3.586  |
| 40  | 662097 | FAM62C    |                                            | NM_031913    | 4.036  | 1.137  | 2.060  | 1.102  | 4.512  | 5.184  | 6.696          | 1.599      | 5.184           | 3.585  |
| 41  | 660608 | MST1R     | *2,3                                       | NM_002447    | 6.004  | 4.432  | 10.582 | 10.604 | 11.571 | 11.594 | 12.267         | 8.289      | 11.866          | 3.577  |
| 50  | 659480 | CLDN3     | *1                                         | NM_001306    | 9.726  | 9.699  | 5.843  | 6.410  | 12.876 | 11.192 | 10.711         | 8.136      | 11.192          | 3.056  |
| 51  | 651178 | ATP1B1    | *1                                         | NM_001677    | 11.681 | 10.629 | 14.082 | 13.155 | 15.771 | 15.611 | 15.095         | 12.354     | 15.349          | 2.995  |
| 53  | 680370 | PLLP      | *2,3                                       | NM_015993    | 6.510  | 5.257  | 5.667  | 5.258  | 7.732  | 8.125  | 9.363          | 5.590      | 8.423           | 2.833  |
| 54  | 681571 | EMP2      | *2,3                                       | NM_001424    | 9.136  | 10.534 | 10.430 | 9.606  | 12.021 | 12.696 | 14.497         | 9.887      | 12.696          | 2.809  |
| 62  | 644613 | KCNN4     | *2,3                                       | NM_002250    | 11.308 | 7.861  | 11.383 | 9.344  | 13.162 | 12.115 | 12.847         | 10.315     | 12.847          | 2.532  |
| 79  | 649702 | CYB561    | *2,3                                       | NM_001017916 | 9.786  | 8.208  | 11.592 | 11.139 | 12.427 | 12.580 | 11.995         | 10.455     | 12.427          | 1.971  |
| 99  | 677059 | ZDHHC21   | *2,3                                       | NM_178566    | 7.959  | 8.605  | 7.835  | 8.985  | 9.772  | 9.537  | 9.445          | 8.170      | 9.589           | 1.420  |
| 206 | 665985 | C3AR1     | *2                                         | NM_004054    | 7.223  | 7.381  | 7.207  | 7.374  | 7.668  | 7.527  | 7.877          | 7.298      | 7.668           | 0.370  |

**Supplementary Table 1. Surface associated proteins upregulated in MV permissive vs. non-permissive epithelial cell lines.**

Footnotes: 1, tested in screen 1; 2, tested in screen 2; 3: significantly up-regulated mRNAs in both screens. Further proteins tested in screen 1 not in the table: P2RY2 (NM\_002564), EFNB2 (NM\_004093), CDH1 (NM\_004360), ITGA3 (NM\_002204), MYO1D (NM\_015194), SLC2A1 (NM\_006516), ITGB4 (NM\_000213), PVRL3 (NM\_015480), TRIP6 (NM\_003302), CLDN12 (NM\_012129), MET (NM\_000245), MUC20 (NM\_001098516), P2RY6 (NM\_004154), SLAMF7 (NM\_021181), AQP4 (NM\_001650), SDC2 (NM\_002998). Values represent the log2 values of quantile normalized mRNA expression intensities.

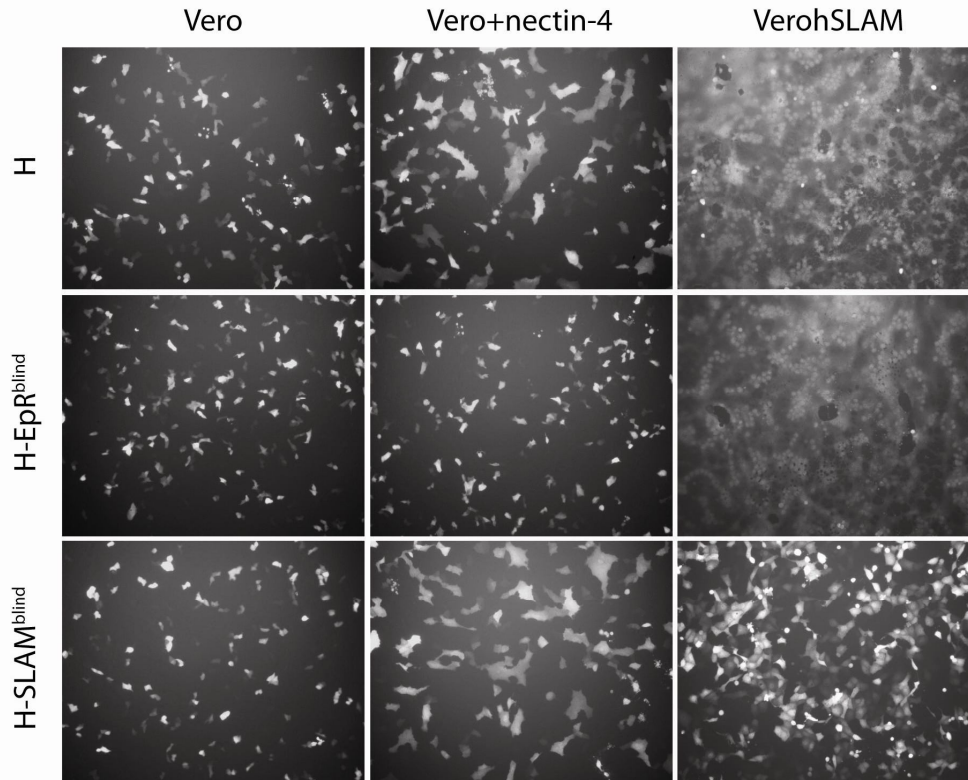

**Supplementary Fig. 1. Expression of nectin-4 confers MV glycoprotein-dependent membrane fusion.**

To assess nectin-4 function we transiently co-expressed it with both MV glycoproteins F and H, and GFP to visualize transfected cells. H is the receptor-binding protein, while F fuses the donor and acceptor membranes. Vero cells not expressing a receptor were mock-transfected (first column), or transfected with a nectin-4 expression plasmid (second column). In addition, plasmids expressing the three variants of the H protein indicated on the left (H-EpR<sup>blind</sup>, H, and H-SLAM<sup>blind</sup>), were co-transfected with a F-expressing plasmid, and a GFP-expressing plasmid that allowed visualizing the transfected cells. The “receptor-blind” proteins have mutations disallowing entry selectively through one receptor<sup>13</sup>. The plasmids expressing the different H proteins were also co-transfected with a GFP-expressing plasmid in VerohSLAM cells expressing the SLAM receptor (third column). While co-expression of standard H and F proteins elicited fusion of cells expressing either SLAM or nectin-4 (first row, second to third panels), the selectively EpR-blind H protein sustained fusion only of SLAM-expressing cells (second row, third panel). Conversely, the SLAM-blind H protein sustained fusion only of cells expressing nectin-4 (third row, second panel). Since nectin-4 is functionally equivalent to the EpR, we renamed MV-EpR<sup>blind</sup> as MV-nectin4<sup>blind</sup>.

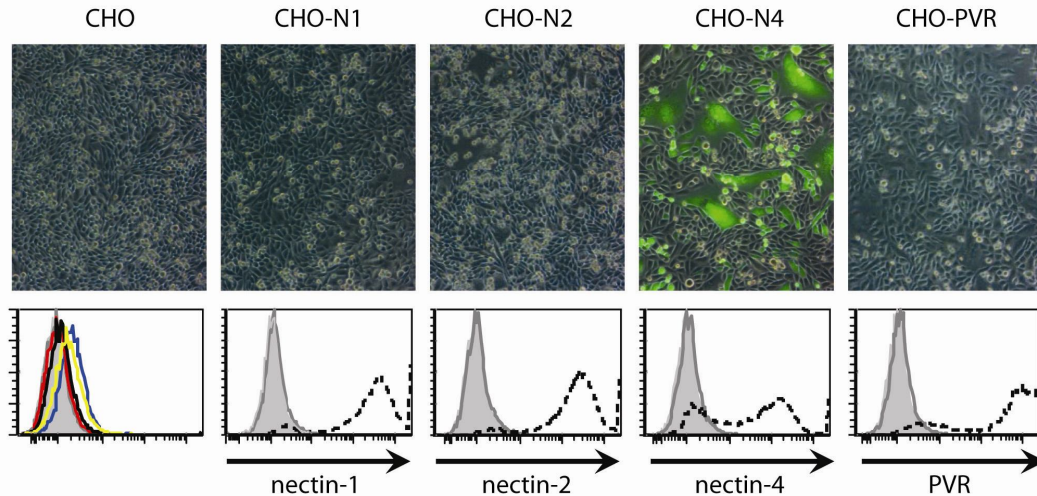

**Supplementary Fig. 2. Nectin-4, but not other human nectins or the related poliovirus receptor (PVR), has MV receptor function.**

Top row: MV-GFP infection of Chinese hamster ovary (CHO) cells (left panel), or CHO-derived stable cell lines expressing the four members of the PVRL/nectin protein family indicated on the top (second to fifth panels). CHO-N1, -N2 and -N4: CHO cells expressing human nectin-1, -2, or -4, respectively. CHO-PVR: cells expressing the poliovirus receptor (PCR), the original member of this protein family. Nectin-3 was tested in our original screen with the other 21 receptor candidates, but did not sustain MV entry (Supplementary Table 1, footnote). Only cells expressing nectin-4 formed syncytia that emitted green fluorescence after MV-GFP infection. Bottom row: expression of nectin family proteins was confirmed by FACS analysis. All panels: grey shading, unstained controls; grey solid line, isotype controls; black dashed line, staining against relevant nectins. First panel: blue/red/black/yellow solid lines, anti-nectin1/2/4/PVR staining, respectively.

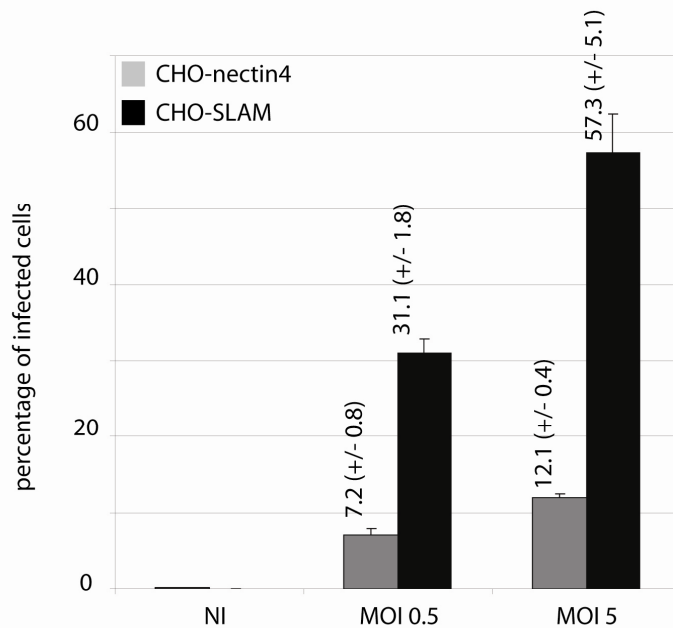

**Supplementary Fig. 3. MV infects and replicates more efficiently in SLAM-expressing cells than in nectin4-expressing cells.**

To assess the MV infectivity depending on the receptor, we infected CHO-nectin4 or CHO-SLAM stable cell lines with MV at a MOI of 0.5 or 5 with a MV-GFP virus. At 4 hrs post infection, the medium was replaced by medium containing the fusion-inhibiting peptide Z-d-Phe-I-Phe-Gly-OH (FIP). At 48 hrs post infection, the cells were harvested and stained for the surface expression of nectin-4 or SLAM. We then determined the percentage of infected cells (expressing GFP) in the population of cells expressing the receptor by FACS analysis. The graphs represent the means and standard deviations of experiments performed in duplicates (NI) or triplicates (MOI 0.5 and MOI 5).

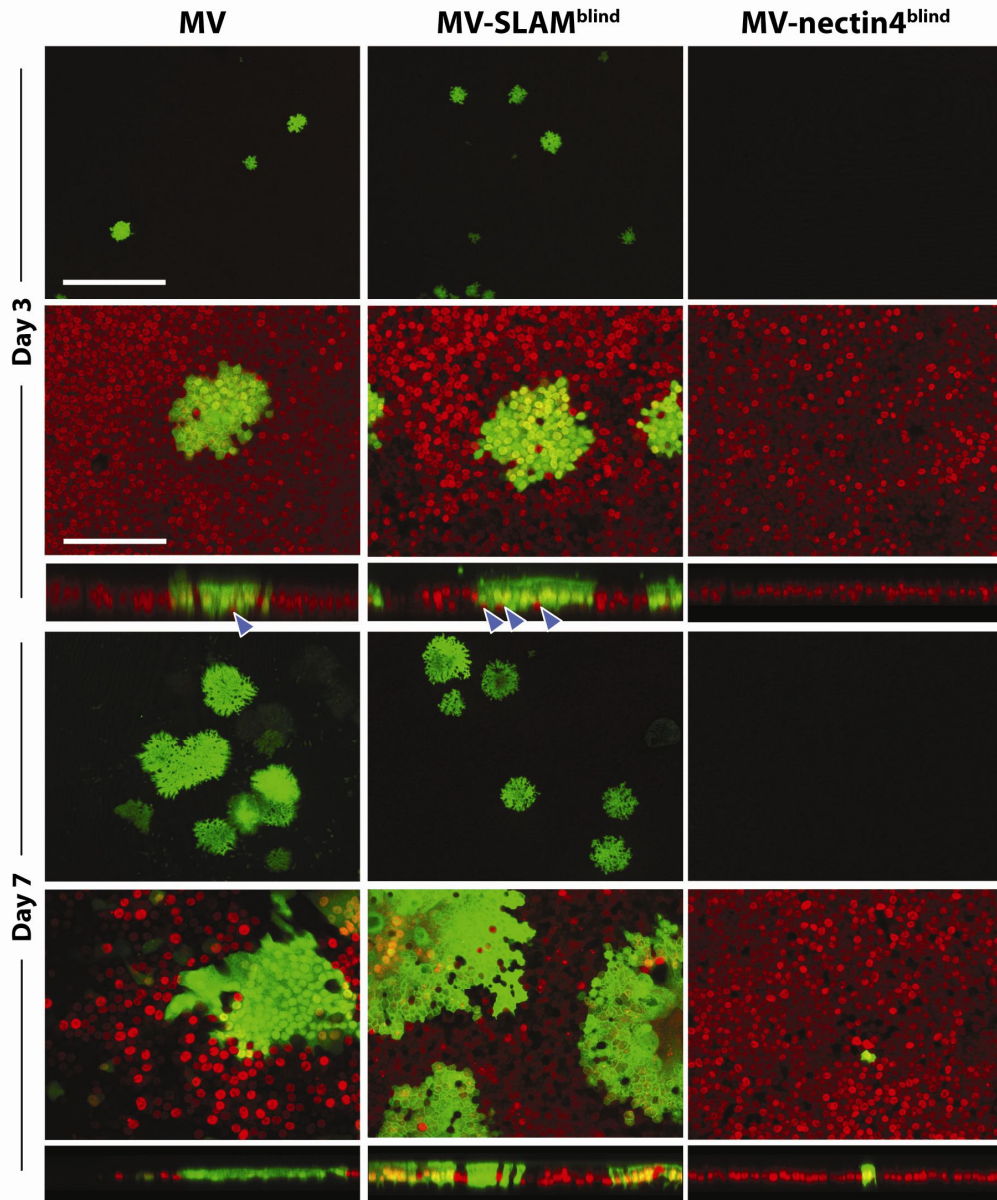

**Supplementary Fig. 4. MV not recognizing nectin-4 does not spread in human airway epithelia.**

Confocal images were taken 3 days (panels in top half) or 7 days (panels in bottom half) after basolateral virus inoculation at a MOI of 0.1. In both analyses the top panel is a low power image (scale bar = 500 microns), the center panel is a high power image, and the bottom panel is a vertical section of the center panel (scale bar = 100 microns). MV and MV-SLAM<sup>blind</sup> infections were cell-type selective: only ciliated columnar cells spanning the epithelium and with the ACC were infected, while basal cells located at the base of the epithelium were spared (left and center columns, days 3 and 7; marked with arrowheads in day 3 panel). Infections of all viruses often regressed after 1-2 weeks (data not shown), possibly due to innate immune functions of these primary cells. Confocal images were captured with a Bio-Rad Radiance 2100 multiphoton confocal microscope. Cell nuclei were counterstained with TO-PRO-3 (red).

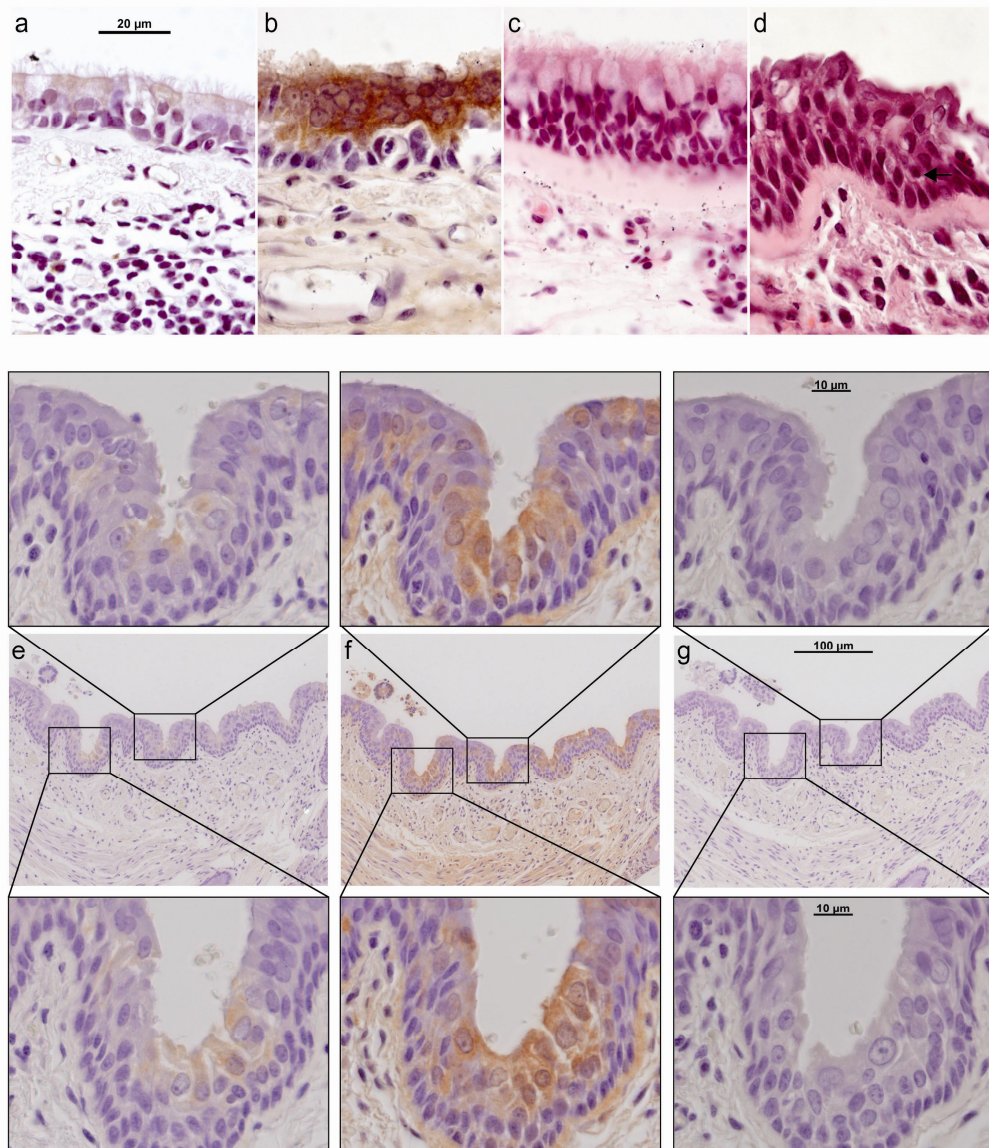

**Supplementary Fig. 5. Multifocal infection of nectin-4 expressing cells in monkey tracheal epithelium 12 days after inoculation with MV.**

a and b, paraffin sections stained with a non-specific antibody (a) or an antibody against the viral nucleocapsid (b) and counterstained with eosin as described in the Online Methods section at 100x magnification. c and d, hematoxylin- stained paraffin sections of trachea from control (c) and infected (d) animals at 100x magnification. Morphological changes were noted, including focal destruction of the multilayer epithelia with loss of goblet cells and cilia, occasional possible inclusion bodies (arrow in d), and areas of epithelial hyperplasia. e-g, paraffin sections stained with an antibody against the viral nucleocapsid (e), a nectin-4 antibody (f), or a non-specific antibody (g) at 20x magnification. The areas indicated by boxes are also shown at 100x magnification. Multifocal viral infection was monitored in nectin-4 expressing cells (insets in e).

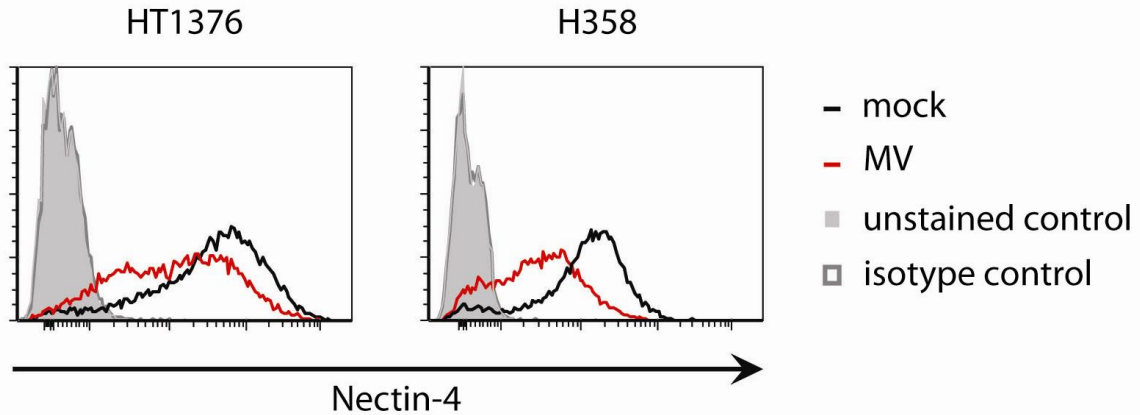

**Supplementary Fig. 6. Nectin-4 is downregulated after MV infection.**

To assess downregulation of nectin-4 after MV infection, lung (H358) and bladder (HT1376) epithelial cell lines expressing nectin-4 were infected with MV at a MOI of 1. Nectin-4 expression levels of mock (black solid line) and MV (red solid line) infected cells were assessed 48 hrs after infection by FACS analysis. For this purpose, cells were detached, stained for nectin-4 expression as described in online methods, and analyzed on an LSRII-SORP analyzer using Diva software (BD Biosciences). Dark grey lines: isotype controls; light grey shadings: unstained controls. Vertical axis: cell number. Horizontal axis: level of nectin-4 expression.

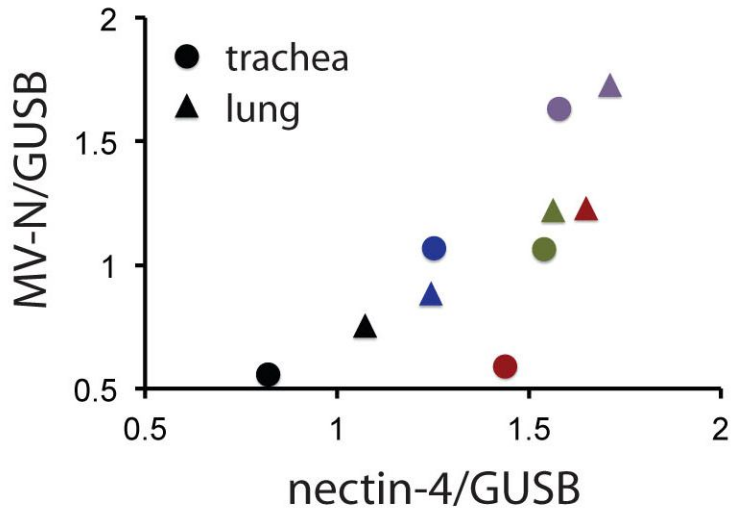

**Supplementary Fig. 7. MV infection correlates with nectin-4 expression levels in airway tissue of cynomolgus macaques.**

Real time PCR was used to quantify MV nucleoprotein (N), nectin-4, and  $\beta$ -glucuronidase (GUSB) mRNA levels in trachea and lung tissues isolated from infected cynomolgus macaques. X-axis: MV N/GUSB Ct ratio of each sample. Y-axis: nectin-4/GUSB Ct ratios. Different colors indicate different individuals. The correlation coefficient  $r$  was 0.77 (high). We suggest this correlation is due to the fact that a threshold level of nectin-4 expression is required for productive infection. Frozen trachea, lung, and bladder samples harvested from one control non-infected and five infected cynomolgus macaques on day 12 after infection were weighed, homogenized in RLT buffer (QIAGEN) containing 1%  $\beta$ -mercaptoethanol, and total cellular RNA was extracted (RNeasy Mini, Qiagen). The QuantiTect SYBR Green RT-PCR kit (QIAGEN) was used to quantify MV N and nectin-4 mRNA levels compared to the housekeeping gene  $\beta$ -glucuronidase in different tissues following the manufacturer's protocol using a RotorGene RG-3000A thermocycler (Corbett). Primers for MV N and nectin-4 will be available on request, and commercial primers (SA Biosciences/QIAGEN) were used to amplify  $\beta$ -glucuronidase. Melting curve analysis and quantification were performed using the RotorGene 6.0 software package (Corbett).



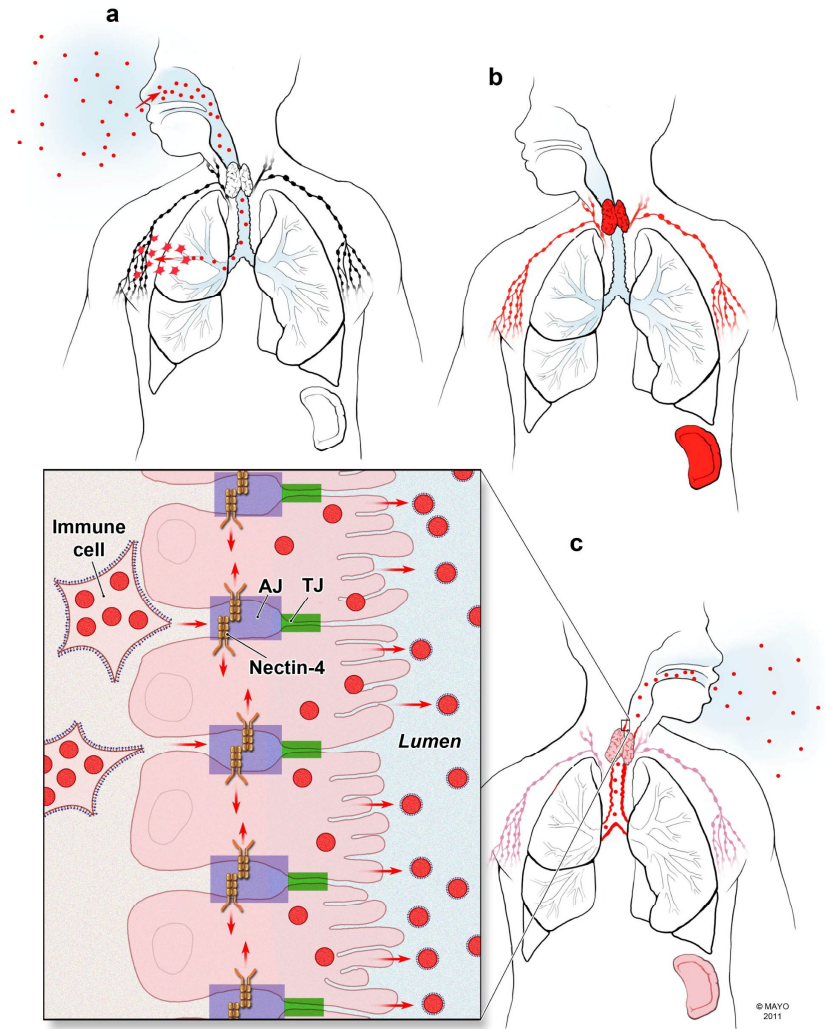

**Supplementary Fig. 8. Model of the MV infectious cycle.**

In the lymphatic phase of infection (a and b) SLAM is used as receptor; in the epithelial phase (c and inset) nectin-4 is used. Infectious viral particles are shown as red spheres; viral glycoproteins are drawn as small spikes on the spheres in the inset close-up. Infected cells and organs are shown in red at the peak of infection in one organ, or in pink after the peak. a, MV enters the airways and infects macrophages and dendritic cells, which ferry the infection to the local lymph nodes. b, MV infects the local lymph nodes and the infection spreads rapidly to the primary lymphatic organs thymus and spleen (shown in red). c, infection spreads to the epithelium. Inset: MV enters the epithelium of the airways carried from an infected immune cell that expresses the viral glycoproteins on its plasma membrane. The viral H protein binds to nectin-4 (yellow) in the adherens junction (AJ, blue rectangle), which is located basolateral to the tight junction (TJ, green rectangle). Infection spreads laterally via tight junctions (red arrows). Epithelial cells express viral glycoproteins in their membranes (not shown for simplicity). Progeny viral particles are released in the trachea (epithelium shown in red) and expelled by coughing and sneezing.
